# Supplementary material for: Quality Characteristics of Raspberry Fruits from Dormancy Plants and Their Feasibility as Food Ingredients
Source: MDPI journal article supplement (doi:10.3390/foods12244443), 2023-12-11
Supplement: s1 [file s1]

# Quality characteristics of raspberry fruits from dormancy plants and their feasibility as food ingredients

Sílvia Petronilho\*, Manuel A. Coimbra, and Cláudia P. Passos\*

\* Correspondence: silviapetronilho@ua.pt (S.P.) and cpassos@ua.pt (C.P.P.)

## Supplementary material

### Figure captions:

**Figure S1.** Scheme of the muffin' making procedure.

**Figure S2.** Example of the chromatogram obtained for fresh raspberry fruits of Pacific Deluxe variety from dormancy state: Cy-3-s: Cyanidin-3-*O*-sophoroside, Cy-3-gr: Cyanidin-3-*O*-glucosyl rutinoside, Cy 3-(6''-dg): Cyanidin-3-(6'-dioxalyl-glucoside), Cy 3-(6''-s-gl): Cyanidin-3-(6'-succinyl-glucoside).

**Figure S3.** Images of the muffins using 60, 90, and 120 drupelets of fresh, freeze-dried, and convective-dried raspberry fruits at 40 °C.

**Figure S4.** a) Images of the muffins prepared with different raising agents and with 120 raspberry drupelets: muffins made with sodium bicarbonate (left) and muffins made with yeast (right) and b) muffins pH and its correspondence with the raising agent used.

### Table captions:

**Table S1.** Tentatively identified phenolic compounds, at 520 nm, in fresh, freeze-dried, and convective-dried (30 °C and 40°C) raspberry fruits of Pacific Deluxe and Versailles varieties from dormancy state.

**Table S2.** Ingredients and respective quantity used in muffins' formulations.

**Table S3.** Mean values of lightness ( $L^*$ ), red-green ( $a^*$ ), yellow-blue ( $b^*$ ), and total colour difference ( $\Delta E$ ) in the lower side of muffins baked with different drupelets amounts (0, 60, 90, 120) of fresh, freeze-dried, and convective dried (40 °C) raspberry fruits from Versailles variety from dormancy state.

**Table S4.** Physical parameters of muffins baked with sodium bicarbonate and yeast raising agents with 120 fresh drupelets from Versailles variety from dormancy state.

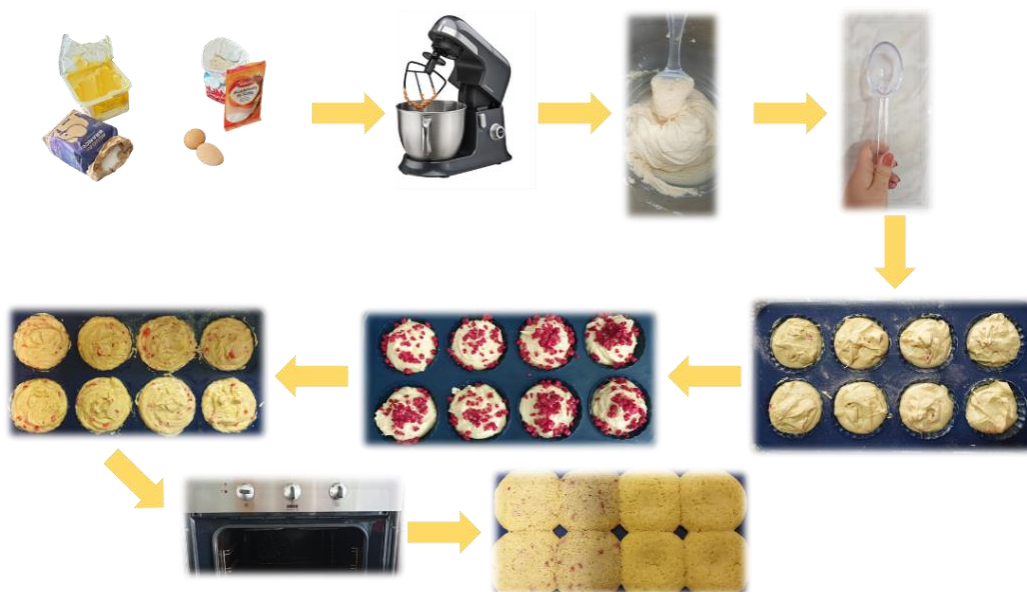

**Figure S1.** Scheme of the muffin' making procedure.

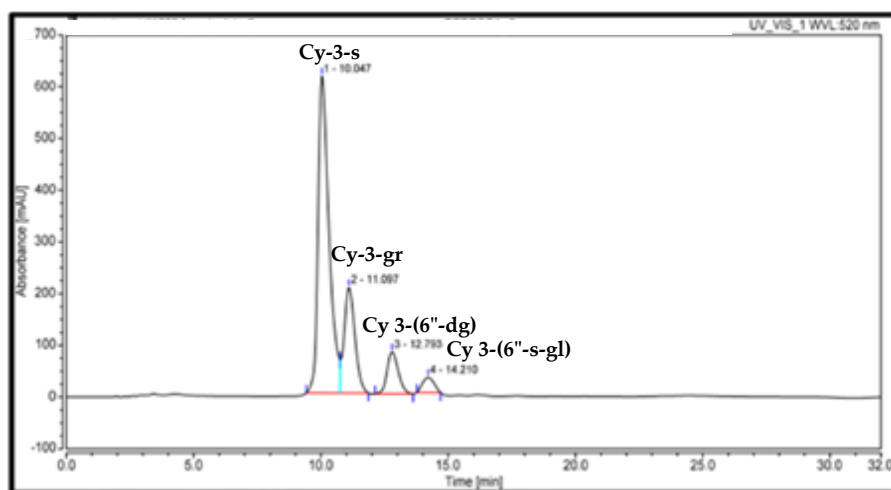

**Figure S2.** Example of the chromatogram obtained for fresh raspberry fruits of Pacific Deluxe variety from dormancy state: Cy-3-s: Cyanidin-3-*O*-sophoroside, Cy-3-gr: Cyanidin-3-*O*-glucosyl rutinoside, Cy 3-(6''-dg): Cyanidin-3-(6'-dioxalyl-glucoside), Cy 3-(6''-s-gl): Cyanidin-3-(6'-succinyl-glucoside).

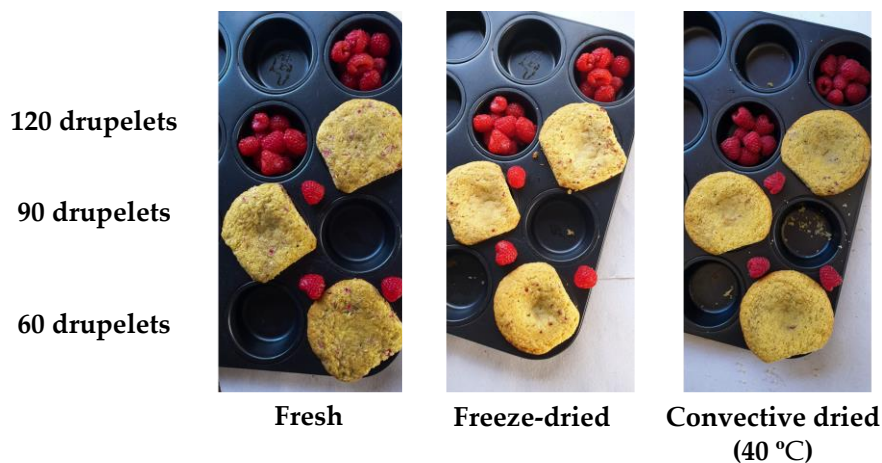

**Figure S3.** Images of the muffins using 60, 90, and 120 drupelets of fresh, freeze-dried, and convective-dried raspberry fruits at 40 °C.

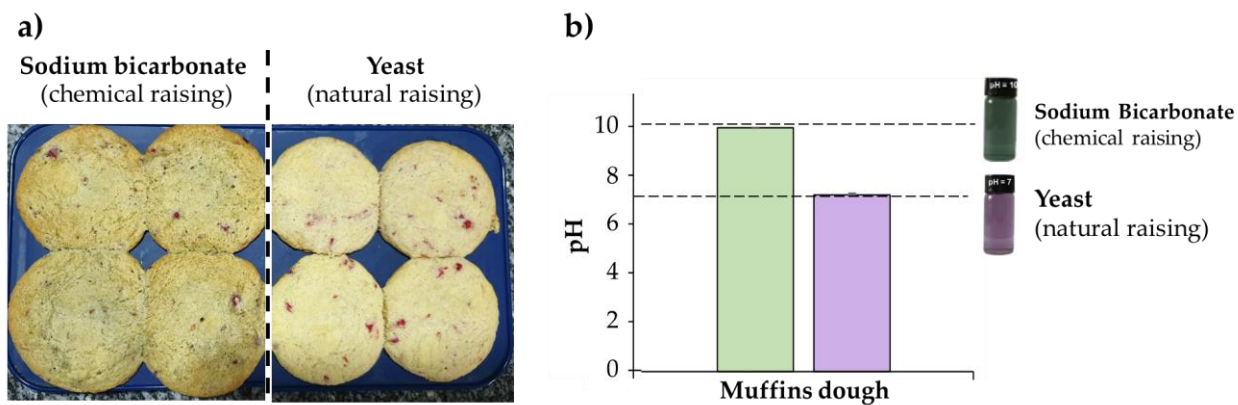

**Figure S4.** a) Images of the muffins prepared with different raising agents and with 120 raspberry drupelets: muffins made with sodium bicarbonate (left) and muffins made with yeast (right) and b) muffins pH and its correspondence with the raising agent used.

**Table S1.** Tentatively identified phenolic compounds, at 520 nm, in fresh, freeze-dried, and convective dried (30 °C and 40°C) raspberry fruits of Pacific Deluxe and Versailles varieties from dormancy state.

| RT (min) | Compound                                  | MS ( <i>m/z</i> ) | MS <sup>2</sup> ( <i>m/z</i> ) |
|----------|-------------------------------------------|-------------------|--------------------------------|
| 10.047   | Cyanidin-3- <i>O</i> -sophoroside         | 609.38            | 285.07                         |
| 11.097   | Cyanidin-3- <i>O</i> -glucosyl rutinoside | 755.42            | 285.10                         |
| 12.793   | Cyanidin-3-(6'-dioxalyl-glucoside)        | 593.38            | 285.16                         |
| 14.210   | Cyanidin-3-(6'-succinyl-glucoside)        | 771.40            | 285.10                         |

RT: retention time in minutes; MS: mass spectrum.

**Table S2.** Ingredients and respective quantity used in muffins' formulations.

| Ingredients                           | Mass (g)       |
|---------------------------------------|----------------|
| Wheat flour                           | 360            |
| Sugar                                 | 270            |
| Butter without salt                   | 200            |
| Mixed egg (egg number)                | 2              |
| Sodium bicarbonate/Yeast <sup>1</sup> | 9              |
| Raspberry (drupelets number)          | 0, 60, 90, 120 |

<sup>1</sup>Replacement of the sodium bicarbonate with the same amount of yeast.

**Table S3.** Mean values of lightness (*L*<sup>\*</sup>), red-green (*a*<sup>\*</sup>), yellow-blue (*b*<sup>\*</sup>), and total colour difference ( $\Delta E$ ) in the lower side of muffins baked with different drupelets amounts (0, 60, 90, 120) of fresh, freeze-dried, and convective dried (40 °C) raspberry fruits from Versailles variety from dormancy state.

|                         | Drupelets | <i>L</i> <sup>*</sup>     | <i>a</i> <sup>*</sup>     | <i>b</i> <sup>*</sup>     | $\Delta E$ | Colour <sup>1</sup>                                                                   |
|-------------------------|-----------|---------------------------|---------------------------|---------------------------|------------|---------------------------------------------------------------------------------------|
| <b>Muffins downside</b> |           |                           |                           |                           |            |                                                                                       |
| Fresh                   | 0         | 47.34 ± 1.97 <sup>a</sup> | 14.74 ± 0.76 <sup>a</sup> | 33.78 ± 1.34 <sup>a</sup> | -          |  |
|                         | 60        | 49.23 ± 3.53 <sup>a</sup> | 13.12 ± 1.97 <sup>a</sup> | 34.10 ± 3.37 <sup>a</sup> | 2.50       |                                                                                       |
|                         | 90        | 42.43 ± 2.13 <sup>a</sup> | 13.97 ± 1.61 <sup>a</sup> | 28.32 ± 6.44 <sup>a</sup> | 7.38       |                                                                                       |
|                         | 120       | 41.37 ± 4.28 <sup>a</sup> | 12.43 ± 1.20 <sup>a</sup> | 28.12 ± 6.81 <sup>a</sup> | 8.54       |                                                                                       |
| Freeze-dried            | 0         | 47.34 ± 1.97 <sup>a</sup> | 14.74 ± 0.76 <sup>a</sup> | 33.78 ± 1.34 <sup>a</sup> | -          |  |
|                         | 60        | 45.16 ± 2.65 <sup>a</sup> | 15.35 ± 0.76 <sup>a</sup> | 31.72 ± 2.72 <sup>a</sup> | 3.06       |                                                                                       |
|                         | 90        | 45.07 ± 2.84 <sup>a</sup> | 15.48 ± 0.54 <sup>a</sup> | 31.65 ± 2.41 <sup>a</sup> | 3.20       |                                                                                       |
|                         | 120       | 45.25 ± 4.42 <sup>a</sup> | 14.61 ± 0.77 <sup>a</sup> | 31.10 ± 3.06 <sup>a</sup> | 3.41       |                                                                                       |
| Dried at 40 °C          | 0         | 39.48 ± 1.97 <sup>a</sup> | 16.40 ± 0.76 <sup>a</sup> | 34.40 ± 1.34 <sup>a</sup> | -          |  |
|                         | 60        | 45.45 ± 5.45 <sup>a</sup> | 13.67 ± 1.67 <sup>a</sup> | 32.38 ± 2.80 <sup>a</sup> | 6.87       |                                                                                       |
|                         | 90        | 45.97 ± 5.97 <sup>a</sup> | 12.35 ± 1.35 <sup>a</sup> | 32.05 ± 1.73 <sup>a</sup> | 8.00       |                                                                                       |
|                         | 120       | 46.69 ± 6.69 <sup>a</sup> | 13.20 ± 1.20 <sup>a</sup> | 32.16 ± 2.58 <sup>a</sup> | 8.20       |                                                                                       |

<sup>1</sup> Fruits colour using an online correspondence CIELab parameters program using RGB (red, green, and blue) values (<https://www.e-paint.co.uk/convert-lab.asp>).  $\Delta E$  is the colour difference found in the formulation prepared with different amounts of drupelets compared to the corresponding control (without drupelets). For type of sample, in each column, different lower-case letters represent significantly different values ( $p < 0.05$ ).

**Table S4.** Physical parameters of muffins baked with sodium bicarbonate and yeast raising agents with 120 fresh drupelets from Versailles variety from dormancy state.

| Raising agent | Drupelets | Weight (g)                | Parameters (cm)          |                          |                          |                          |                          |
|---------------|-----------|---------------------------|--------------------------|--------------------------|--------------------------|--------------------------|--------------------------|
|               |           |                           | 1                        | 2                        | 3                        | 4                        | 5                        |
| Bicarbonate   | 0         | 38.3 ± 3.1 <sup>a,A</sup> | 7.7 ± 0.3 <sup>a,A</sup> | 8.6 ± 0.2 <sup>a,A</sup> | 1.5 ± 0.0 <sup>a,A</sup> | 2.8 ± 0.3 <sup>a,A</sup> | 2.0 ± 0.1 <sup>a,A</sup> |
|               | 120       | 40.3 ± 2.6 <sup>a,A</sup> | 7.4 ± 0.3 <sup>a,A</sup> | 8.2 ± 0.2 <sup>a,A</sup> | 1.5 ± 0.1 <sup>a,A</sup> | 2.7 ± 0.3 <sup>a,A</sup> | 2.2 ± 0.2 <sup>a,A</sup> |
| Yeast         | 0         | 45.0 ± 2.0 <sup>a,B</sup> | 7.2 ± 0.2 <sup>a,A</sup> | 8.1 ± 0.4 <sup>a,A</sup> | 1.5 ± 0.1 <sup>a,A</sup> | 2.4 ± 0.2 <sup>a,B</sup> | 2.2 ± 0.3 <sup>a,A</sup> |
|               | 120       | 44.0 ± 1.0 <sup>a,B</sup> | 7.4 ± 0.6 <sup>a,A</sup> | 7.7 ± 0.3 <sup>a,B</sup> | 1.5 ± 0.1 <sup>a,A</sup> | 2.3 ± 0.2 <sup>a,B</sup> | 2.2 ± 0.2 <sup>a,A</sup> |

The physical parameters 1 - length, 2 - width, 3 – base height, 4 - total side height, and 5 - total height by the middle, given in cm, were determined according to Figure 1. For each type of raising agent, in each column, different lowercase letters represent significantly different values ( $p < 0.05$ ), while the uppercase letters represent significantly different values ( $p < 0.05$ ) among the muffins, independently of the raising agent.
